# Supplementary material for: Evaluation of the Strength at Home Group Intervention for Intimate Partner Violence in the Veterans Affairs Health System
Source: PubMed Central journal article supplement (PMC10015307; doi:10.1001/jamanetworkopen.2023.2997), 2023-03-14
Supplement: jamanetwopen-e232997-s001.pdf [file jamanetwopen-e232997-s001.pdf]

## Supplementary Online Content

Creech SK, Benzer JK, Bruce L, Taft CT. Evaluation of the Strength at Home group intervention for intimate partner violence in the Veterans Affairs health system. *JAMA Netw Open*. 2023;6(3):e232997. doi:10.1001/jamanetworkopen.2023.2997

### **eTable.** Missing Data Patterns

This supplementary material has been provided by the authors to give readers additional information about their work.

**eTable.** Missing Data Patterns

| Grp | Lifetime IPV |      |     |      | Demographics and Service Use |      |     |     |      |       |       |       |
|-----|--------------|------|-----|------|------------------------------|------|-----|-----|------|-------|-------|-------|
|     | COER         | PHYS | PSY | REPR | WHIT                         | BLCK | SAT | AGE | FEML | COURT | HISPN | #Sess |
| 1   | X            | X    | X   | X    | X                            | X    | X   | X   | X    | X     | X     | X     |
| 2   | X            | X    | X   | X    | X                            | X    | X   | X   | X    | X     | X     | X     |
| 3   | X            | X    | X   | X    | X                            | X    | X   | X   | X    | X     | X     | X     |
| 4   | X            | X    | X   | X    | X                            | X    | X   | X   | X    | X     | X     | X     |
| 5   | X            | X    | X   | X    | X                            | X    | X   | X   | X    | X     | X     | X     |
| 6   | X            | X    | X   | X    | X                            | X    | X   | X   | X    | X     | X     | X     |
| 7   | X            | X    | X   | X    | X                            | X    | X   | X   | X    | X     | X     | X     |
| 8   | X            | X    | X   | X    | X                            | X    | X   | X   | X    | X     | X     | X     |
| 9   | X            | X    | X   | X    | X                            | X    | X   | X   | X    | X     | X     | X     |
| 10  | X            | X    | X   | X    | X                            | X    | X   | X   | X    | X     | X     | X     |
| 11  | X            | X    | X   | X    | X                            | X    | X   | X   | X    | X     | X     | X     |
| 12  | X            | X    | X   | X    | X                            | X    | X   | X   | X    | X     | X     | X     |
| 13  | X            | X    | X   | X    | X                            | X    | X   | X   | X    | X     | X     | X     |
| 14  | X            | X    | X   | X    | X                            | X    | X   | X   | X    | X     | X     | X     |
| 15  | X            | X    | X   | X    | X                            | X    | X   | X   | X    | X     | X     | X     |
| 16  | X            | X    | X   | X    | X                            | X    | X   | X   | X    | X     | X     | X     |
| 17  | X            | X    | X   | X    | X                            | X    | X   | X   | X    | X     | .     | X     |
| 18  | X            | X    | X   | X    | X                            | X    | X   | X   | X    | .     | X     | X     |
| 19  | X            | X    | X   | X    | X                            | X    | X   | X   | X    | .     | X     | X     |
| 20  | X            | X    | X   | X    | X                            | X    | X   | X   | .    | X     | X     | X     |
| 21  | X            | X    | X   | X    | X                            | X    | X   | X   | .    | X     | X     | X     |
| 22  | X            | X    | X   | X    | X                            | X    | X   | X   | .    | X     | X     | X     |
| 23  | X            | X    | X   | X    | X                            | X    | X   | X   | .    | X     | X     | X     |
| 24  | X            | X    | X   | X    | X                            | X    | X   | X   | .    | X     | X     | X     |
| 25  | X            | X    | X   | X    | X                            | X    | X   | X   | .    | X     | X     | X     |
| 26  | X            | X    | X   | X    | X                            | X    | X   | X   | .    | .     | X     | X     |
| 27  | X            | X    | X   | X    | X                            | X    | X   | .   | X    | X     | X     | X     |
| 28  | X            | X    | X   | X    | X                            | X    | X   | .   | .    | X     | X     | X     |
| 29  | X            | X    | X   | X    | X                            | X    | .   | X   | X    | X     | X     | X     |
| 30  | X            | X    | X   | X    | X                            | X    | .   | X   | X    | X     | X     | X     |
| 31  | X            | X    | X   | X    | X                            | X    | .   | X   | X    | X     | X     | X     |
| 32  | X            | X    | X   | X    | X                            | X    | .   | X   | X    | X     | X     | X     |
| 33  | X            | X    | X   | X    | X                            | X    | .   | X   | X    | X     | X     | X     |
| 34  | X            | X    | X   | X    | X                            | X    | .   | X   | X    | X     | X     | X     |

|    |   |   |   |   |   |   |   |   |   |   |   |   |
|----|---|---|---|---|---|---|---|---|---|---|---|---|
| 35 | X | X | X | X | X | X | . | X | X | X | X | X |
| 36 | X | X | X | X | X | X | . | X | X | X | X | X |
| 37 | X | X | X | X | X | X | . | X | X | X | X | X |
| 38 | X | X | X | X | X | X | . | X | X | X | X | X |
| 39 | X | X | X | X | X | X | . | X | X | X | X | X |
| 40 | X | X | X | X | X | X | . | X | X | X | X | X |
| 41 | X | X | X | X | X | X | . | X | X | X | X | X |
| 42 | X | X | X | X | X | X | . | X | X | X | . | X |
| 43 | X | X | X | X | X | X | . | X | X | X | . | X |
| 44 | X | X | X | X | X | X | . | X | X | . | X | X |
| 45 | X | X | X | X | X | X | . | X | X | . | . | X |
| 46 | X | X | X | X | X | X | . | X | . | X | X | X |
| 47 | X | X | X | X | X | X | . | X | . | X | X | X |
| 48 | X | X | X | X | X | X | . | X | . | X | X | X |
| 49 | X | X | X | X | X | X | . | X | . | . | X | X |
| 50 | X | X | X | X | X | X | . | . | X | X | X | X |
| 51 | X | X | X | X | X | X | . | . | . | X | X | X |
| 52 | X | X | X | X | X | X | . | . | . | . | X | X |
| 53 | X | X | X | X | . | . | X | X | X | X | X | X |
| 54 | X | X | X | X | . | . | X | X | X | X | X | X |
| 55 | X | X | X | X | . | . | X | X | . | X | X | X |
| 56 | X | X | X | X | . | . | X | X | . | X | X | X |
| 57 | X | X | X | X | . | . | X | . | . | . | . | X |
| 58 | X | X | X | X | . | . | X | . | . | . | . | X |
| 59 | X | X | X | X | . | . | . | X | X | X | X | X |
| 60 | X | X | X | X | . | . | . | X | X | X | X | X |
| 61 | X | X | X | X | . | . | . | X | X | X | X | X |
| 62 | X | X | X | X | . | . | . | X | X | X | . | X |
| 63 | X | X | X | X | . | . | . | X | . | X | X | X |
| 64 | X | X | X | X | . | . | . | . | X | X | X | X |
| 65 | X | X | X | X | . | . | . | . | X | . | X | X |
| 66 | X | X | X | X | . | . | . | . | . | X | . | X |
| 67 | X | X | X | X | . | . | . | . | . | . | . | X |
| 68 | X | X | X | . | X | X | X | X | X | X | X | X |
| 69 | X | X | X | . | X | X | X | X | . | X | X | X |
| 70 | X | X | X | . | X | X | . | X | X | X | X | X |
| 71 | X | X | X | . | X | X | . | X | X | X | X | X |
| 72 | X | X | X | . | X | X | . | X | X | X | X | X |
| 73 | X | X | . | X | X | X | . | X | X | X | X | X |

|    |   |   |   |   |   |   |   |   |   |   |   |   |
|----|---|---|---|---|---|---|---|---|---|---|---|---|
| 74 | X | X | . | X | X | X | . | X | X | X | . | X |
| 75 | X | X | . | X | X | X | . | X | . | X | X | X |
| 76 | X | . | X | X | X | X | X | X | X | X | X | X |
| 77 | X | . | X | X | X | X | . | X | X | X | X | X |
| 78 | X | . | X | X | X | X | . | X | X | X | X | X |
| 79 | X | . | X | X | X | X | . | X | X | X | X | X |
| 80 | X | . | X | X | X | X | . | X | X | X | X | X |
| 81 | X | . | X | . | X | X | X | . | . | X | X | X |
| 82 | X | . | X | . | X | X | . | X | X | . | X | X |
| 83 | X | . | . | X | X | X | . | X | X | X | X | X |
| 84 | . | X | X | X | X | X | X | X | X | X | X | X |
| 85 | . | X | X | X | X | X | X | X | X | X | X | X |
| 86 | . | X | X | X | X | X | . | X | X | X | X | X |
| 87 | . | X | X | X | X | X | . | X | X | X | X | X |
| 88 | . | X | . | X | X | X | . | X | X | X | X | X |
| 89 | . | X | . | X | X | X | . | X | X | X | X | X |
| 90 | . | X | . | X | X | X | . | X | X | X | X | X |
| 91 | . | X | . | . | X | X | . | X | X | X | X | X |
| 92 | . | . | X | . | X | X | . | X | X | X | X | X |
| 93 | . | . | . | . | X | X | X | X | X | X | X | X |
| 94 | . | . | . | . | X | X | X | . | . | . | X | X |
| 95 | . | . | . | . | X | X | . | X | X | X | X | X |
| 96 | . | . | . | . | X | X | . | X | X | X | X | X |
| 97 | . | . | . | . | X | X | . | X | X | X | X | X |
| 98 | . | . | . | . | X | X | . | X | X | X | X | X |

| Grp | Time 1 Outcomes |     |      |      |     |      | Time 2 Outcomes |     |      |      |     |      |
|-----|-----------------|-----|------|------|-----|------|-----------------|-----|------|------|-----|------|
|     | AUD             | PCL | COER | PHYS | PSY | REPR | AUD             | PCL | COER | PHYS | PSY | REPR |
| 1   | X               | X   | X    | X    | X   | X    | X               | X   | X    | X    | X   | X    |
| 2   | X               | X   | X    | X    | X   | X    | X               | X   | X    | X    | X   | .    |
| 3   | X               | X   | X    | X    | X   | X    | X               | X   | X    | X    | .   | X    |
| 4   | X               | X   | X    | X    | X   | X    | X               | X   | X    | .    | X   | X    |
| 5   | X               | X   | X    | X    | X   | X    | X               | X   | .    | X    | X   | X    |
| 6   | X               | X   | X    | X    | X   | X    | X               | X   | .    | .    | .   | .    |
| 7   | X               | X   | X    | X    | X   | .    | X               | X   | X    | X    | X   | X    |
| 8   | X               | X   | X    | .    | X   | X    | X               | X   | X    | X    | X   | X    |
| 9   | X               | X   | .    | .    | .   | .    | X               | X   | X    | X    | X   | X    |

|    |   |   |   |   |   |   |   |   |   |   |   |   |
|----|---|---|---|---|---|---|---|---|---|---|---|---|
| 10 | X | X | X | X | X | X | X | . | X | X | X | X |
| 11 | X | . | X | X | X | X | X | X | X | X | X | X |
| 12 | X | X | X | X | X | X | . | X | X | X | X | X |
| 13 | X | X | X | X | X | X | . | . | X | X | X | X |
| 14 | X | X | X | X | X | X | . | . | X | . | X | X |
| 15 | X | X | X | X | X | X | . | . | . | . | . | . |
| 16 | . | X | X | X | X | X | X | X | X | X | X | X |
| 17 | X | X | X | X | X | X | X | X | X | X | X | X |
| 18 | X | X | X | X | X | X | X | X | X | X | X | X |
| 19 | X | X | X | X | X | X | X | X | . | . | . | . |
| 20 | X | X | X | X | X | X | X | X | X | X | X | X |
| 21 | X | X | X | X | X | X | X | X | . | X | X | X |
| 22 | X | X | X | X | X | X | X | . | X | X | X | X |
| 23 | X | . | X | X | X | X | X | X | X | X | X | X |
| 24 | X | X | X | X | X | X | . | X | X | X | X | X |
| 25 | . | . | X | X | X | X | X | X | X | X | X | X |
| 26 | X | X | X | X | X | X | X | X | X | X | X | X |
| 27 | X | X | X | X | X | X | X | X | X | X | X | X |
| 28 | X | X | X | X | X | X | X | X | X | X | X | X |
| 29 | X | X | X | X | X | X | X | X | X | X | X | X |
| 30 | X | X | X | . | X | X | X | X | X | X | X | X |
| 31 | X | X | X | X | X | X | . | X | X | X | X | X |
| 32 | X | X | X | X | X | X | . | . | X | X | X | X |
| 33 | X | X | X | X | X | X | . | . | . | . | . | . |
| 34 | X | X | X | X | . | X | . | . | . | . | . | . |
| 35 | X | X | X | . | X | X | . | . | . | . | . | . |
| 36 | X | X | X | . | X | . | . | . | . | . | . | . |
| 37 | X | X | . | X | X | X | . | . | . | . | . | . |
| 38 | X | X | . | . | . | . | . | . | . | . | . | . |
| 39 | X | . | X | X | X | X | . | . | . | . | . | . |
| 40 | . | X | X | X | X | X | . | . | . | . | . | . |
| 41 | . | . | X | X | X | X | . | . | . | . | . | . |
| 42 | X | X | X | X | X | X | . | . | X | X | X | X |
| 43 | X | X | X | X | X | X | . | . | . | . | . | . |
| 44 | X | X | X | X | X | X | . | . | . | . | . | . |
| 45 | X | X | X | X | X | X | . | . | . | . | . | . |
| 46 | X | X | X | X | X | X | X | X | X | X | X | X |
| 47 | X | X | X | X | X | X | . | . | X | X | X | X |
| 48 | X | X | X | X | X | X | . | . | . | . | . | . |

|    |   |   |   |   |   |   |   |   |   |   |   |   |
|----|---|---|---|---|---|---|---|---|---|---|---|---|
| 49 | X | X | X | X | X | X | . | . | . | . | . | . |
| 50 | X | X | X | X | X | X | . | . | . | . | . | . |
| 51 | X | X | X | X | X | X | . | . | . | . | . | . |
| 52 | X | X | X | X | X | X | . | . | . | . | . | . |
| 53 | X | X | X | X | X | X | X | X | X | X | X | X |
| 54 | X | X | X | X | X | X | X | X | . | X | X | X |
| 55 | X | X | X | X | X | X | X | X | X | X | X | X |
| 56 | X | X | X | X | X | X | X | . | X | X | X | X |
| 57 | X | X | X | X | X | X | . | . | . | . | . | . |
| 58 | . | . | X | X | X | X | X | X | X | X | X | X |
| 59 | X | X | X | X | X | X | . | . | X | X | X | X |
| 60 | X | X | X | X | X | X | . | . | . | . | . | . |
| 61 | X | . | X | X | X | X | . | . | . | . | . | . |
| 62 | X | X | X | X | X | X | . | . | . | . | . | . |
| 63 | X | X | X | X | X | X | . | . | . | . | . | . |
| 64 | X | X | X | X | X | X | . | . | X | X | X | X |
| 65 | X | X | X | X | X | X | . | . | . | . | . | . |
| 66 | X | X | X | X | X | X | . | . | . | . | . | . |
| 67 | X | X | X | X | X | X | . | . | X | X | X | X |
| 68 | X | X | X | X | X | X | . | . | X | . | X | . |
| 69 | X | X | X | X | X | . | X | X | X | X | X | X |
| 70 | X | X | X | X | X | X | . | . | . | . | . | . |
| 71 | X | X | X | X | X | . | . | . | . | . | . | . |
| 72 | X | X | X | X | . | X | . | . | . | . | . | . |
| 73 | X | X | X | X | X | X | . | . | . | . | . | . |
| 74 | X | X | X | X | X | X | . | . | . | . | . | . |
| 75 | X | X | X | X | X | X | . | . | . | . | . | . |
| 76 | X | X | X | . | X | X | X | X | X | X | X | X |
| 77 | X | X | X | X | X | . | . | . | . | . | . | . |
| 78 | X | X | X | . | X | X | . | . | . | . | . | . |
| 79 | X | X | . | X | X | X | . | . | . | . | . | . |
| 80 | X | . | X | X | X | X | . | . | . | . | . | . |
| 81 | X | X | X | . | X | X | X | X | X | X | X | X |
| 82 | X | X | X | . | X | . | . | . | . | . | . | . |
| 83 | X | X | X | X | X | X | . | . | . | . | . | . |
| 84 | X | X | X | X | X | X | X | X | X | X | X | X |
| 85 | X | X | . | X | X | X | X | X | X | X | X | X |
| 86 | X | X | X | X | X | X | . | . | . | . | . | . |
| 87 | X | X | . | X | X | X | . | . | . | . | . | . |

|    |   |   |   |   |   |   |   |   |   |   |   |   |
|----|---|---|---|---|---|---|---|---|---|---|---|---|
| 88 | X | X | X | X | . | X | . | . | . | . | . | . |
| 89 | X | X | X | . | X | X | . | . | . | . | . | . |
| 90 | . | . | X | X | X | X | . | . | . | . | . | . |
| 91 | X | X | . | X | . | . | . | . | . | . | . | . |
| 92 | X | X | . | . | X | . | . | . | . | . | . | . |
| 93 | X | X | . | . | . | . | X | X | X | X | X | X |
| 94 | X | X | X | X | X | X | X | X | X | X | X | X |
| 95 | X | X | X | X | X | X | . | . | . | . | . | . |
| 96 | X | X | X | X | X | . | . | . | . | . | . | . |
| 97 | X | X | . | . | . | . | . | . | . | . | . | . |
| 98 | . | X | X | X | X | X | . | . | . | . | . | . |

Note. Missing data were imputed using the following variables: IPV measured as lifetime prevalence, pre-treatment, and post-treatment, the AUDIT-C and PCL scores pre-treatment and post-treatment, and the following demographic and service use auxiliary variables: white race, black race, treatment satisfaction, age, female gender, court-referred, Hispanic ethnicity, number of sessions completed.
