# Supplementary material for: Evaluation of the Strength at Home Group Intervention for Intimate Partner Violence in the Veterans Affairs Health System
Source: PubMed Central journal article supplement (PMC10015307; doi:10.1001/jamanetworkopen.2023.2997), 2023-03-14
Supplement: jamanetwopen-e232997-s002.pdf [file jamanetwopen-e232997-s002.pdf]

## Data Sharing Statement

Creech. Evaluation of the Strength at Home Group Intervention for Intimate Partner Violence in the Veterans Affairs Health System. *JAMA Netw Open*. Published March 14, 2023.  
doi:10.1001/jamanetworkopen.2023.2997

### Data

**Data available:** No

### Additional Information

**Explanation for why data not available:** Pending appropriate institutional approvals summary data can be shared.
